# Supplementary material
Source: PubMed Central journal article supplement (PMC2756730)
Supplement: NIHMS141301-supplement-1.pdf [file NIHMS141301-supplement-1.pdf]

(A) Representative  $I_{sAHP}$  traces elicited by brief depolarization (80ms, 50mV) of CA3 pyramidal neurons in WT mice. Example  $I_{sAHP}$  is shown during control period (black) and after kainate receptor-mediated inhibition (red). (B) Representative  $I_{sAHP}$  traces in  $GluK4^{-/-}/GluK5^{-/-}$  mice before (black) and after (red) inhibition with 50nM kainate. Calibration 50pA, 2s (C) Grouped data from all recordings in which 50nM kainate was applied to inhibit  $I_{sAHP}$ . (D)  $I_{sAHP}$  inhibition in WT (black) and  $GluK4^{-/-}/GluK5^{-/-}$  mice (grey) produced by several concentrations of kainic acid.

## Supplemental

### Figure S1 Generation of $GluK4$ knockout mouse.

(A) Schematic representation of the *Grik4* gene and targeting construct. Following homologous recombination two loxP sites were inserted into intronic regions flanking exon 14 (Ex 14), along with a loxP flanked neo cassette in the adjacent intronic region. (EV=EcoRV, K=Kpn1, DT=Diphtheria toxin) (B i & ii) Southern blot analysis of targeted clones using two probes external to the targeting at 5' and 3' regions of the gene. Positive clones were identified by the presence of ~9kb band (5' probe) and ~7.5kb band (3' probe). (C) PCR analysis of exon deletion following Cre-mediated recombination of loxP sites. (D)  $GluK4$  transcript is absent in  $GluK4^{-/-}$  mice. RT-PCR failed to amplify any product using primers spanning exon 14 in  $GluK4^{-/-}$  mice (top panel). Amplification of  $GluK2$  gene was used as a positive control for the RT reaction (bottom panel) (E) Immunoblot analysis of hippocampal homogenates from  $GluK4$  and  $GluK4/GluK5$  knockout mice. Protein homogenates were immunoprecipitated with  $\alpha$ - $GluK2$  followed by immunoblotting with  $\alpha$ - $GluK4$ . 125kDa band is absent in samples from  $GluK4^{-/-}$  and  $GluK4^{-/-}/GluK5^{-/-}$  mice. This band corresponds to the predicted size of the  $GluK4$  receptor subunit protein. (F) Nissl stained coronal sections from WT and  $GluK4^{-/-}/GluK5^{-/-}$  mice. There are no gross anatomical differences between the two genotypes. Calibration: 1 mm
