# Supplementary material
Source: PubMed Central journal article supplement (PMC2756730)

A

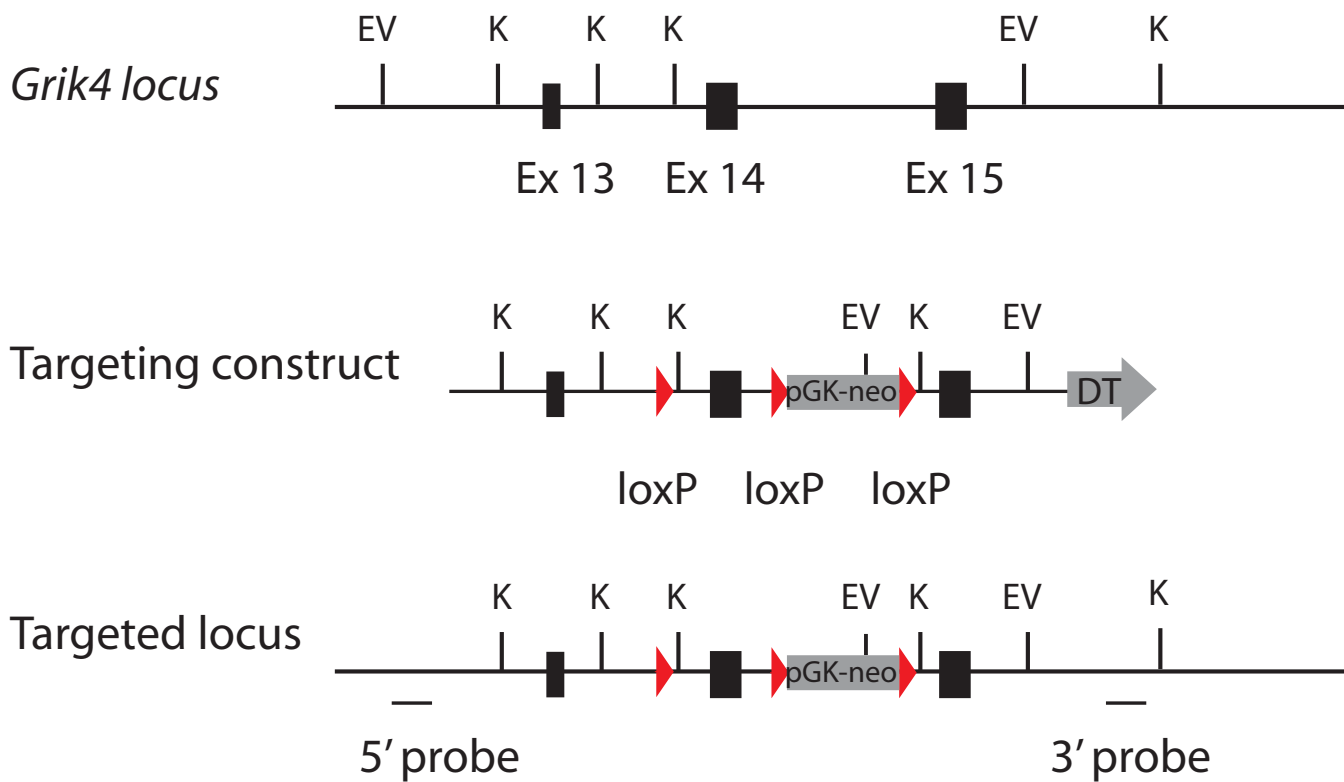

Bi

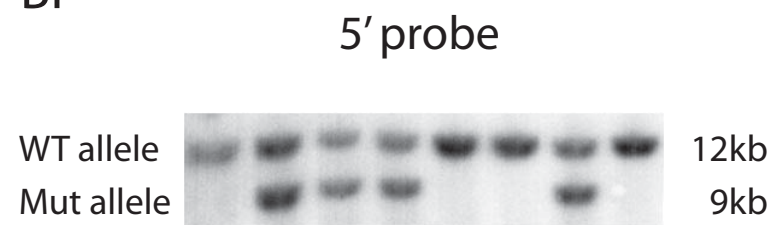

Bii

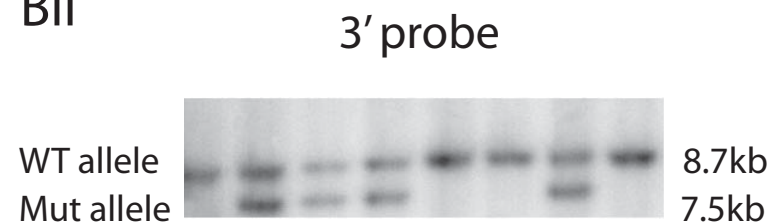

C

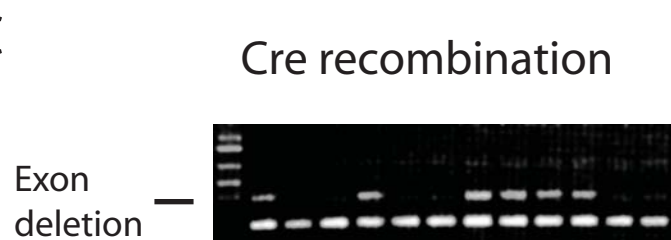

D

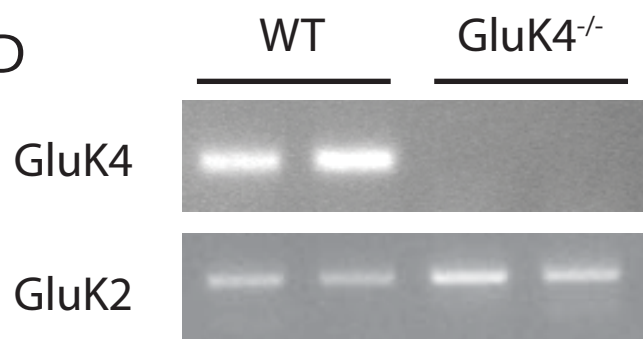

E

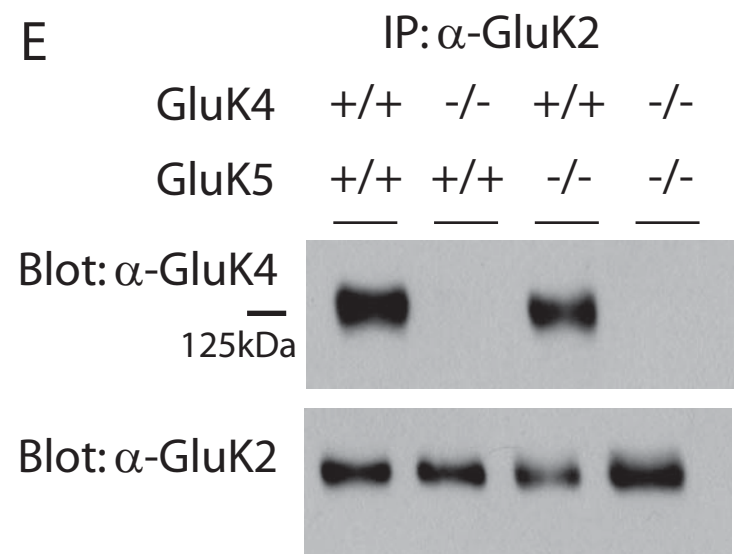

F

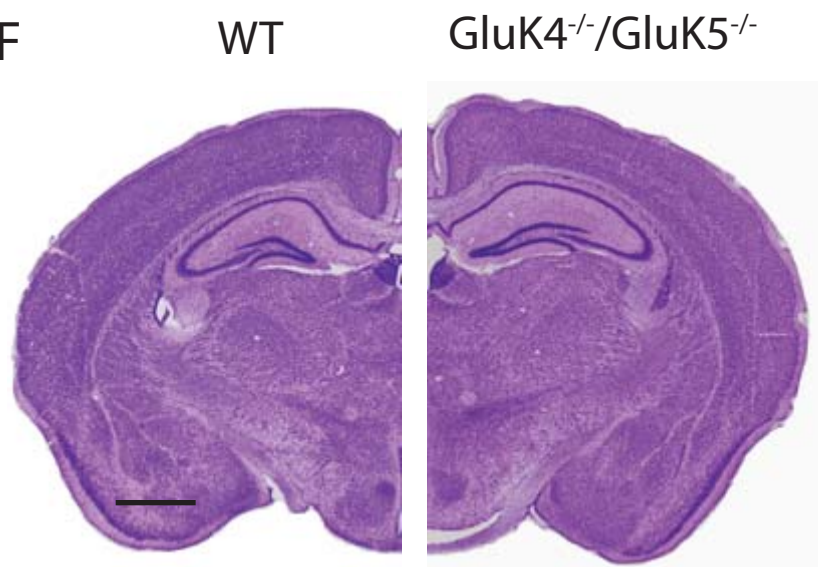

Supplement: NIHMS141301-supplement-01.pdf [file NIHMS141301-supplement-01.pdf]
